# Supplementary material for: Author Impact Factor: tracking the dynamics of individual scientific impact
Source: PubMed Central journal article supplement — Sci Rep. 2014 May 12;4:4880. doi: 10.1038/srep04880 (PMC4017244; doi:10.1038/srep04880), 2014-05-12
Supplement: srep04880-s1.pdf [file srep04880-s1.pdf]

# Supplementary Information: Author Impact Factor: tracking the dynamics of individual scientific impact

Raj Kumar Pan<sup>1</sup> and Santo Fortunato<sup>1</sup>

<sup>1</sup>Department of Biomedical Engineering and Computational Science, Aalto University School of Science, P.O. Box 12200, FI-00076, Finland

## METHODS

Here we use disambiguated “distinct author” data from Thomson Reuters (TR) Web of Knowledge, [isiknowledge.com](http://isiknowledge.com) using their matching algorithms to identify publication profiles of distinct authors. Further, we use its portal [ResearcherID.com](http://ResearcherID.com), where users upload and maintain their publication profiles. We consider a total of 12 Nobel Laureates, 4 each in Physics, Chemistry and Physiology or Medicine. In addition we analyze 550 scientists divided into 4 categories. For the selection of high-impact physicists, we consider the 100 most prolific authors based on their publications in *Physical Review Letters* over the 50-year period 1958-2008. For the selection of high-impact cell biologists we choose the 100 most prolific scientists based on publications in the journal *CELL*. For the selection of high-impact mathematicians we selected the 50 authors with the highest

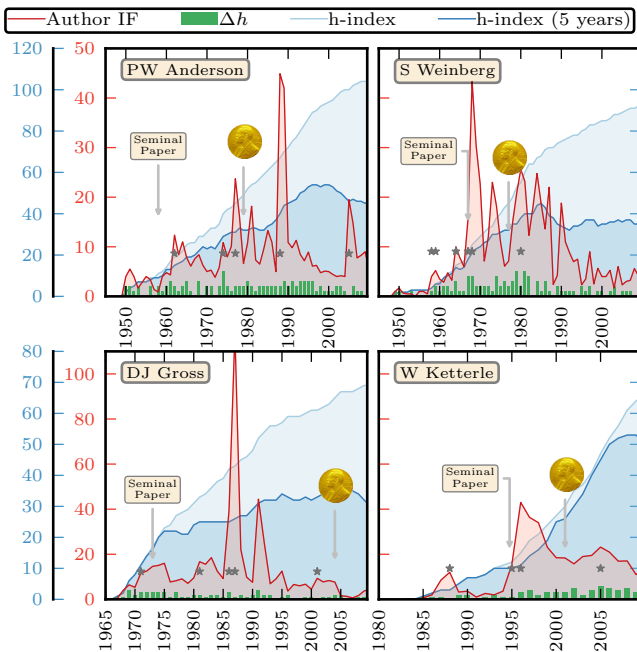

FIG. 1. Evolution of the author impact factor of four Nobel Laureates in Physics (red curve), compared to the evolution of the  $h$ -index of the author, of its yearly variation  $\Delta h$  and of the 5-years  $h$  index. In this case the aggregation period  $\Delta t$  of 2 years was used to calculate the author impact factor. Those years in which the AIF of a scientist significantly differs from his/her average AIF of the past 5 years are marked by a star. Photograph of Nobel Prize Medal in Physics taken by David Monniaux. Photo released under the following licence: David Monniaux/CC BY SA 2.0.

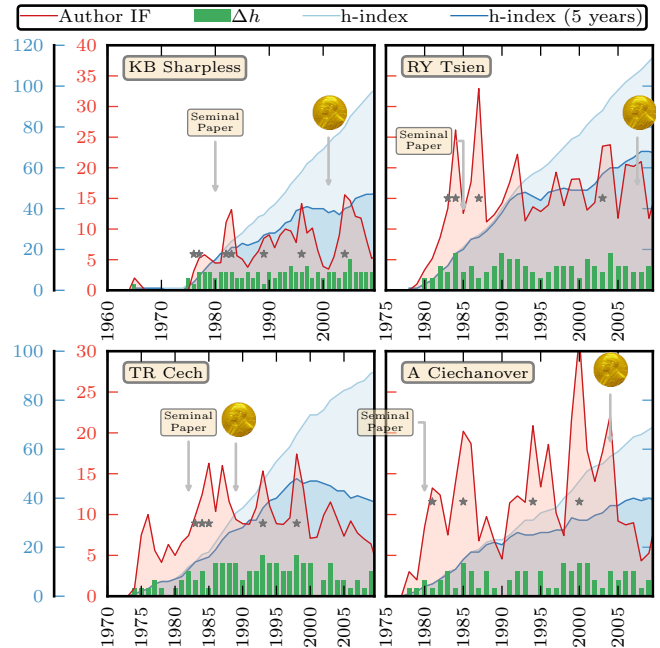

FIG. 2. Same as Fig. 3, for Nobel Laureates in Chemistry. Photograph of Nobel Prize Medal in Chemistry taken by David Monniaux. Photo released under the following licence: David Monniaux/CC BY SA 2.0.

number of publications in the prestigious journal *Annals of Mathematics*. We also consider 100 relatively young assistant professors from physics. To select the scientists in this dataset, we choose two assistant professors from each of the top 50 U.S. physics and astronomy departments ranked according to the magazine *U.S. News*.

To categorize each paper according to its field of publication we use the TR subject categories. We then aggregated these subject categories into broader scientific fields. A detailed description is provided in Table I

## RESULTS

We used the aggregation period of 2 years to calculate the author impact factor (AIF) for the Nobel laureates in Physics (Fig. 1), Chemistry (Fig. 2), and Physiology or Medicine (Fig. 3). Although there are relatively more fluctuations, the variation of the AIF(2 years) is qualitatively similar to the variation of the AIF(5 years). The 2-year window is however short for most scientists, especially for the young ones. As the paper only shows the AIF for the most prominent scientists, both the 2-year

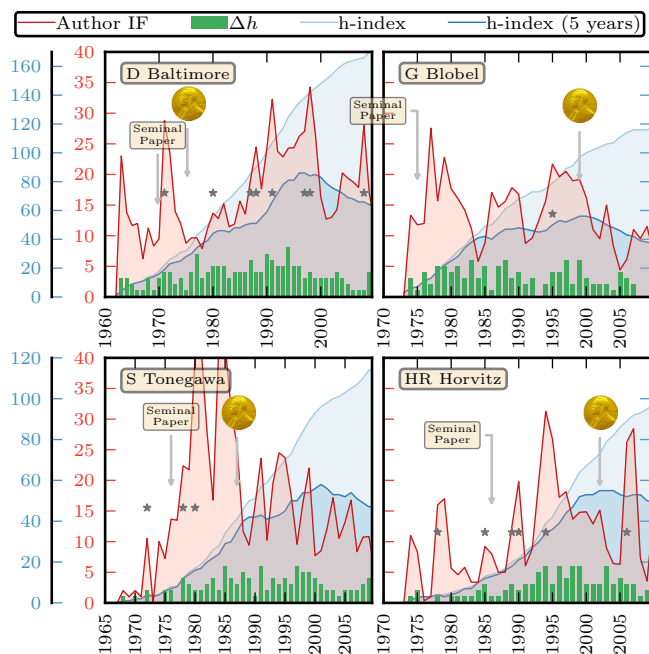

and 5-year AIF yield similar results.

FIG. 3. Same as Fig. 3, for Nobel Laureates in Physiology or Medicine. Photograph of Nobel Prize Medal in Physics taken by David Monniaux. Photo released under the following licence: David Monniaux/CC BY SA 2.0.

| Fields                       | TR subject categories                       |
|------------------------------|---------------------------------------------|
| Physics                      | IMAGING SCIENCE & PHOTOGRAPHIC TECHNOLOGY   |
|                              | PHYSICS, APPLIED                            |
|                              | OPTICS                                      |
|                              | INSTRUMENTS & INSTRUMENTATION               |
|                              | PHYSICS, CONDENSED MATTER                   |
|                              | PHYSICS, FLUIDS & PLASMAS                   |
|                              | PHOTOGRAPHIC TECHNOLOGY                     |
|                              | PHYSICS, ATOMIC, MOLECULAR & CHEMICAL       |
|                              | ACOUSTICS                                   |
|                              | PHYSICS                                     |
|                              | PHYSICS, MATHEMATICAL                       |
|                              | MECHANICS                                   |
|                              | PHYSICS, NUCLEAR                            |
|                              | SPECTROSCOPY                                |
|                              | THERMODYNAMICS                              |
|                              | PHYSICS, PARTICLES & FIELDS                 |
| NUCLEAR SCIENCE & TECHNOLOGY |                                             |
| PHYSICS, MULTIDISCIPLINARY   |                                             |
| ASTRONOMY & ASTROPHYSICS     |                                             |
| Mathematics                  | STATISTICS & PROBABILITY                    |
|                              | MATHEMATICS, APPLIED                        |
|                              | MATHEMATICS, INTERDISCIPLINARY APPLICATIONS |
|                              | LOGIC                                       |
|                              | MATHEMATICS                                 |
| Chemistry                    | MATHEMATICS, MISCELLANEOUS                  |
|                              | CHEMISTRY, INORGANIC & NUCLEAR              |
|                              | ELECTROCHEMISTRY                            |
|                              | CHEMISTRY, PHYSICAL                         |
|                              | CHEMISTRY, ANALYTICAL                       |
|                              | POLYMER SCIENCE                             |
|                              | CHEMISTRY, MULTIDISCIPLINARY                |
|                              | CRYSTALLOGRAPHY                             |
|                              | CHEMISTRY, APPLIED                          |
|                              | CHEMISTRY                                   |
| CHEMISTRY, ORGANIC           |                                             |

|                        |                                                                                                                                                                                                                                                                                                                                                                                                                                                                                                                                                                                                                                                                                                                                                                                                                                                                                                                                                                                                                                                                                                                                                                                                                                                                                                                                                                                                                                                                                             |
|------------------------|---------------------------------------------------------------------------------------------------------------------------------------------------------------------------------------------------------------------------------------------------------------------------------------------------------------------------------------------------------------------------------------------------------------------------------------------------------------------------------------------------------------------------------------------------------------------------------------------------------------------------------------------------------------------------------------------------------------------------------------------------------------------------------------------------------------------------------------------------------------------------------------------------------------------------------------------------------------------------------------------------------------------------------------------------------------------------------------------------------------------------------------------------------------------------------------------------------------------------------------------------------------------------------------------------------------------------------------------------------------------------------------------------------------------------------------------------------------------------------------------|
| Physiology or Medicine | CYTOLOGY & HISTOLOGY<br>BIOCHEMISTRY & MOLECULAR BIOLOGY<br>CELL BIOLOGY<br>BIOCHEMICAL RESEARCH METHODS<br>CELL & TISSUE ENGINEERING<br>MATHEMATICAL & COMPUTATIONAL BIOLOGY<br>BIOPHYSICS<br>BIOMETHODS<br>MICROSCOPY<br>ENGINEERING, BIOMEDICAL<br>IMMUNOLOGY<br>MEDICAL LABORATORY TECHNOLOGY<br>MEDICINE, RESEARCH & EXPERIMENTAL<br>PARASITOLOGY<br>PHYSIOLOGY<br>ANATOMY & MORPHOLOGY<br>PATHOLOGY<br>ONCOLOGY<br>RHEUMATOLOGY<br>VASCULAR DISEASES<br>PSYCHIATRY<br>GERIATRICS & GERONTOLOGY<br>DENTISTRY, ORAL SURGERY & MEDICINE<br>OPHTHALMOLOGY<br>DENTISTRY/ORAL SURGERY & MEDICINE<br>MEDICINE, LEGAL<br>EMERGENCY MEDICINE & CRITICAL CARE<br>CLINICAL NEUROLOGY<br>TRANSPLANTATION<br>HEMATOLOGY<br>INFECTIOUS DISEASES<br>RESPIRATORY SYSTEM<br>PERIPHERAL VASCULAR DISEASE<br>MEDICINE, GENERAL & INTERNAL<br>PEDIATRICS<br>EMERGENCY MEDICINE<br>INTEGRATIVE & COMPLEMENTARY MEDICINE<br>GASTROENTEROLOGY & HEPATOLOGY<br>DERMATOLOGY<br>REHABILITATION<br>ANESTHESIOLOGY<br>TROPICAL MEDICINE<br>MEDICINE, MISCELLANEOUS<br>ENDOCRINOLOGY & METABOLISM<br>NEUROIMAGING<br>ANDROLOGY<br>ORTHOPEDICS<br>OBSTETRICS & GYNECOLOGY<br>ALLERGY<br>CRITICAL CARE MEDICINE<br>OTORHINOLARYNGOLOGY<br>RADIOLOGY, NUCLEAR MEDICINE & MEDICAL IMAGING<br>SURGERY<br>CARDIAC & CARDIOVASCULAR SYSTEMS<br>DERMATOLOGY & VENEREAL DISEASES<br>AUDIOLOGY & SPEECH-LANGUAGE PATHOLOGY<br>RADIOLOGY & NUCLEAR MEDICINE<br>UROLOGY & NEPHROLOGY<br>CRITICAL CARE<br>CARDIOVASCULAR SYSTEM |
|------------------------|---------------------------------------------------------------------------------------------------------------------------------------------------------------------------------------------------------------------------------------------------------------------------------------------------------------------------------------------------------------------------------------------------------------------------------------------------------------------------------------------------------------------------------------------------------------------------------------------------------------------------------------------------------------------------------------------------------------------------------------------------------------------------------------------------------------------------------------------------------------------------------------------------------------------------------------------------------------------------------------------------------------------------------------------------------------------------------------------------------------------------------------------------------------------------------------------------------------------------------------------------------------------------------------------------------------------------------------------------------------------------------------------------------------------------------------------------------------------------------------------|

TABLE I: Aggregation of TR subject categories in broader fields.
